# Supplementary material
Source: MDPI journal article supplement (https://www.mdpi.com/2073-4395/13/12/3009)
Supplement: s1 [file s1]

**Table S1.** The content of identified substances: polyphenols, flavonoids, free amino acids and reducing sugars [mg/gDW].

| Light quality | Polyphenols<br>[mg GAE/g DW] | Flavonoids<br>[mg QE/g DW] | Free amino acids<br>[mg Gly/g DW] | Reducing sugars<br>[mg/g DW] |
|---------------|------------------------------|----------------------------|-----------------------------------|------------------------------|
| B             | 37.13±1.94 <sup>bc</sup>     | 649.78±48.02 <sup>c</sup>  | 9.24±0.72 <sup>de</sup>           | 308.52±9.55 <sup>b</sup>     |
| R             | 30.85±0.42 <sup>a</sup>      | 515.44±29.52 <sup>ab</sup> | 13.44±0.50 <sup>g</sup>           | 420.55±9.21 <sup>e</sup>     |
| RB            | 36.92±4.21 <sup>bc</sup>     | 590.37±53.10 <sup>bc</sup> | 8.56±0.39 <sup>d</sup>            | 361.81±3.38 <sup>c</sup>     |
| RBUV          | 32.53±1.68 <sup>ab</sup>     | 493.45±43.81 <sup>a</sup>  | 5.66±0.29 <sup>b</sup>            | 329.32±14.17 <sup>b</sup>    |
| RBG           | 41.87±0.63 <sup>cd</sup>     | 585.43±36.82 <sup>bc</sup> | 6.62±0.26 <sup>c</sup>            | 420.41±12.08 <sup>e</sup>    |
| RBV           | 29.71±3.24 <sup>a</sup>      | 485.56±16.96 <sup>a</sup>  | 11.22±0.15 <sup>f</sup>           | 532.51±21.44 <sup>f</sup>    |
| RBfR          | 41.13±4.44 <sup>cd</sup>     | 528.97±57.42 <sup>ab</sup> | 3.35±0.15 <sup>a</sup>            | 253.86±12.48 <sup>a</sup>    |
| WLed          | 41.71±4.05 <sup>cd</sup>     | 585.20±30.76 <sup>bc</sup> | 9.78±0.46 <sup>e</sup>            | 381.67±27.31 <sup>cd</sup>   |
| Fl            | 46.65±4.45 <sup>d</sup>      | 610.02±35.36 <sup>c</sup>  | 9.18±0.53 <sup>de</sup>           | 399.75±9.55 <sup>de</sup>    |

B – 100% blue LED of 430 nm; R – 100% red LED of 670 nm; RB – combination of red (70%) and blue (30%) LED; RBUV – 50% RB and 50% ultraviolet LED of 400 nm; RBG – 50% RB and 50% green LED of 528 nm; RBV – 50% RB and 50% yellow of 600 nm; RBfR – 50% RB and 50% far red of 730 nm; WLed – white LED light composed of 33.3% warm white (2700 K), 33.3% neutral white (4500 K), and 33.3% cool white (5700 K); Fl – control, fluorescence lamps.

Means ± standard deviations (n = 3) within a column followed by the same letter are not significantly different according to Duncan's multiple range test at  $p \leq 0.05$  (different letters indicate significantly different means).
